# Supplementary material
Source: PubMed Central journal article supplement (PMC6146319)
Supplement: es8b01886_si_001.pdf [file es8b01886_si_001.pdf]

# Up-scaling reverse electro dialysis

Jordi Moreno<sup>1,2,3</sup>, Simon Grasman<sup>3</sup>, Ronny van Engelen<sup>4</sup>, Kitty Nijmeijer\*<sup>5</sup>

<sup>1</sup>Wetsus, European Centre of Excellence for Sustainable Water Technology, Oostergoweg 9, 8911MA Leeuwarden, the Netherlands

<sup>2</sup>Membrane Science & Technology, University of Twente, P.O. Box 217, 7500AE Enschede, the Netherlands

<sup>3</sup>REDstack BV, Pieter Zeemanstraat 6, 8606JR, Sneek, the Netherlands

<sup>4</sup>FUJIFILM Manufacturing Europe BV, Oudenstaart 1, P.O. Box 90156, 5000 LJ Tilburg, the Netherlands

<sup>5</sup>Membrane Materials and Processes, Department of Chemical Engineering and Chemistry, Eindhoven University of Technology, P.O. Box 513, 5600

MB

Eindhoven, the Netherlands

\*corresponding author: [d.c.nijmeijer@tue.nl](mailto:d.c.nijmeijer@tue.nl)

## Supporting information

### 1. S1. Gibb's Free Energy of Mixing

In this research, the molar flow rate has been used to calculate the Gibb's free energy of mixing. Therefore, the Gibb's free energy is expressed as a power, which for efficiency calculations can be combined with the power produced by the RED stack.

To calculate the Gibb's free energy available in both the inlet and outlet solutions, the following formula is used:

$$\Delta G = -\Delta S \cdot T \quad \text{Eq.S1}$$

Where  $\Delta G$  is the available Gibb's free energy of mixing in (J/s) or (W),  $\Delta S$  is the change in entropy when the solutions would be fully mixed (J/(s·K)) and T is the absolute temperature (K). The available entropy can be calculated as follows:

$$\Delta S = S_m - S_c - S_d \quad \text{Eq.S2}$$

S is the entropy of the individual solutions in (J/(s·K)), the subscripts m, c and d indicate fully mixed, concentrated and diluted solution, respectively. The entropy of each of these individual solutions can be calculated using the following expression:

$$S = -N_{total} \cdot R \cdot \sum_i (x_i \cdot \ln x_i) \quad \text{Eq.S3}$$

31 Where,  $N_{total}$  is the amount of moles in the solution expressed as a molar flowrate (mol/s), R is the universal  
32 gas constant (8.314 J/(mol·K)) and x is the mole fraction of species  $Na^+$ ,  $Cl^-$  and  $H_2O$ .

33 The total amount of moles in the solution is depending on the concentration of the solution. Based on  
34 experimental obtained data of the molality and density of sodium chloride solution at 298 K, a fit has been  
35 made of the molarity with the total amount of moles. Based on the molality of sodium chloride, the total  
36 molality ( $m_{total}$ ) of solution can be calculated:

$$37 \quad m_{total} = \frac{1000 - m_{NaCl} \cdot mm_{NaCl}}{mm_{H_2O}} + m_{NaCl} \quad Eq.S4$$

38 Where  $m_{NaCl}$  is the molality (mol/kg) of sodium chloride,  $mm_{NaCl}$  is the molar mass of sodium chloride (g/mol)  
39 and  $mm_{H_2O}$  is the molar mass of water [g/mol]. The nominator calculates the mass of water in a solution of  
40 one kilogram (g/kg), by subtracting the mass of sodium chloride (g) from the mass of the solution (1000 g).  
41 Dividing by the molar mass of water gives the molality of water in the solution. Adding the molality of  
42 sodium chloride gives the total molarity of the solution [mol/kg].

$$43 \quad M_{total} = m_{total} \cdot \rho \quad Eq.S5$$

44 Multiplying the total molality with the density (kg/l) gives the total amount of moles ( $M_{total}$ ) per liter solution  
45 (mol/l). With the density of sodium chloride solutions related to the molality of sodium chloride, a plot can  
46 be made of the total amount of moles as a function of the molarity of sodium chloride. A 4th degree  
47 polynomial is fitted on this data ( $R^2 = 0.9998$ ), to get a correlation between the molarity and the total  
48 amount of moles per liter of solution. This correlation is used to calculate the total amount of moles based  
49 on the measured concentration.

50 With the calculated total amount of moles per liter, also the molar fractions of each of the species can be  
51 calculated. By multiplying the total amount of moles per liter (mol/l) with the measured flow rate (l/s), the  
52 molar flow rate  $N_{total}$  can be calculated (mol/s) following;

$$53 \quad N_{total} = M_{total} \cdot \Phi \quad Eq.S6$$

54 The molar flow rate of sodium and chloride can also be calculated using a formula analogue to the formula  
55 above. Only substituting the total amount of moles for the molarity of sodium and chloride. The molar flow  
56 rate of water can then be calculated by subtracting the molar flow rate of sodium and chloride from the  
57 total molar flow rate.

58 
$$N_{H_2O} = N_{total} - N_{Na^+} - N_{Cl^-} \quad Eq.S7$$

59 The molar fractions  $x$  (-) of each of the species  $Na^+$ ,  $Cl^-$  and  $H_2O$ , can then be calculated as follows:

60 
$$x_i = \frac{N_i}{N_{total}} \quad Eq.S8$$

61
